# Supplementary material
Source: publisher site journal article supplement (https://www.dovepress.com/article/332513)
Supplement: Supplementary file 1 [file Supplementary_figures.pdf › Supplementary_figures.pdf]

**sFigure 1**

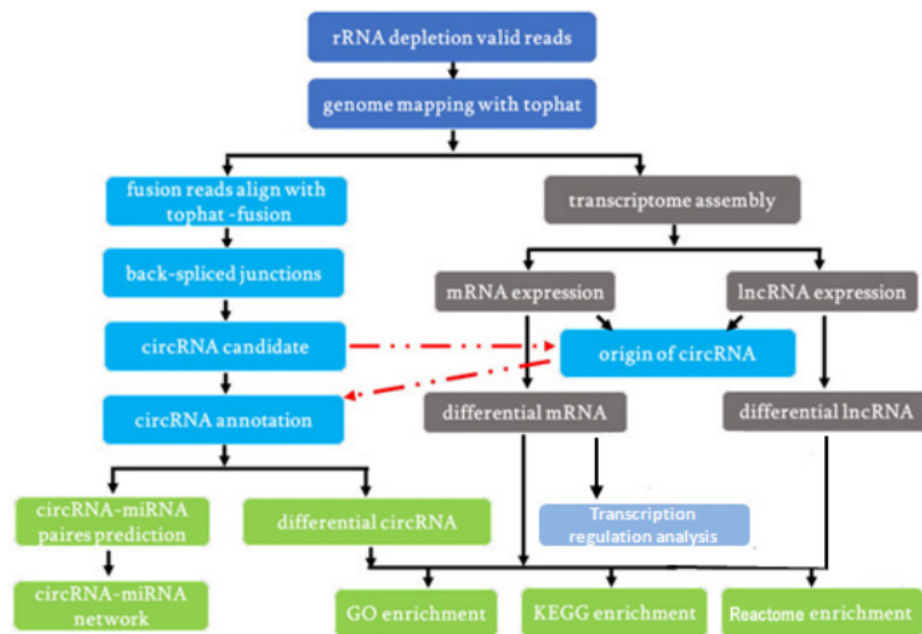

**sFigure 1** The experiment workflow and data analysis flowchart.

sFigure 2A

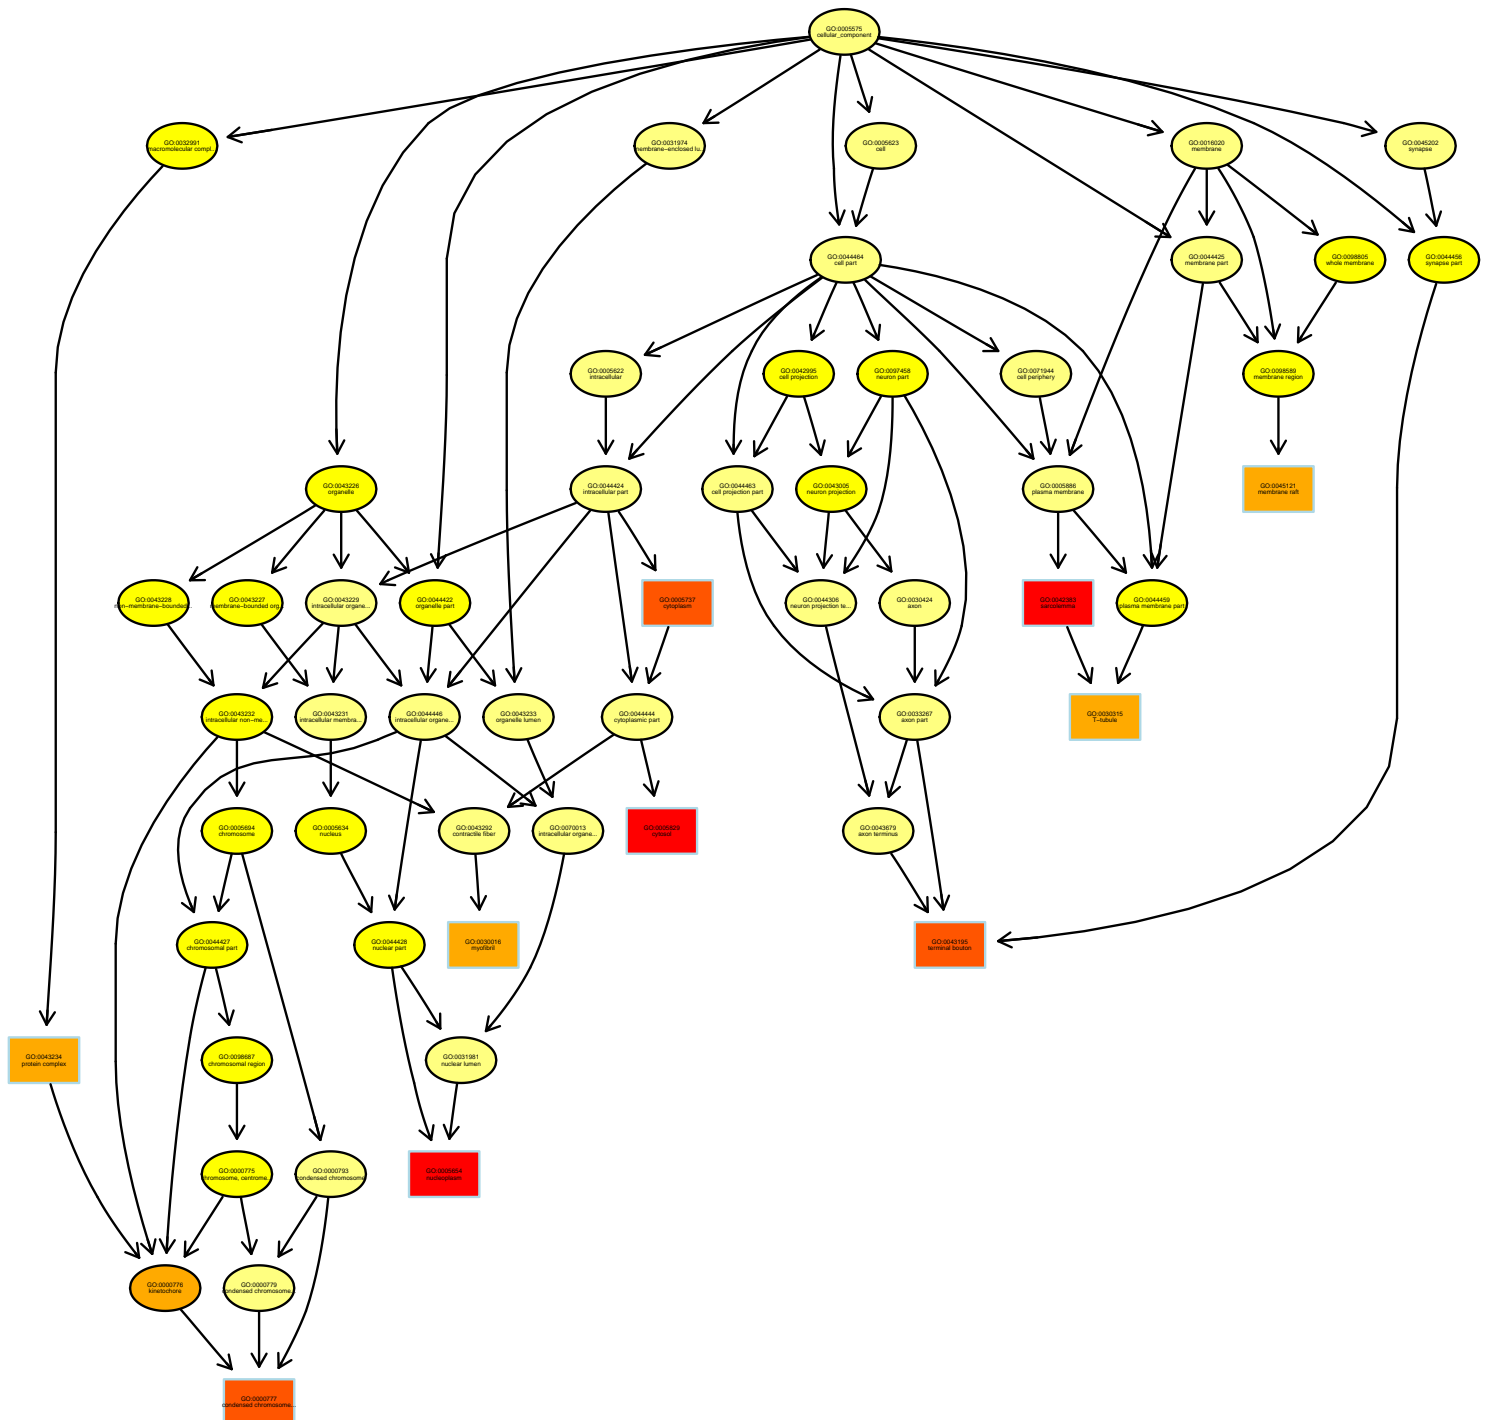

## sFigure 2B

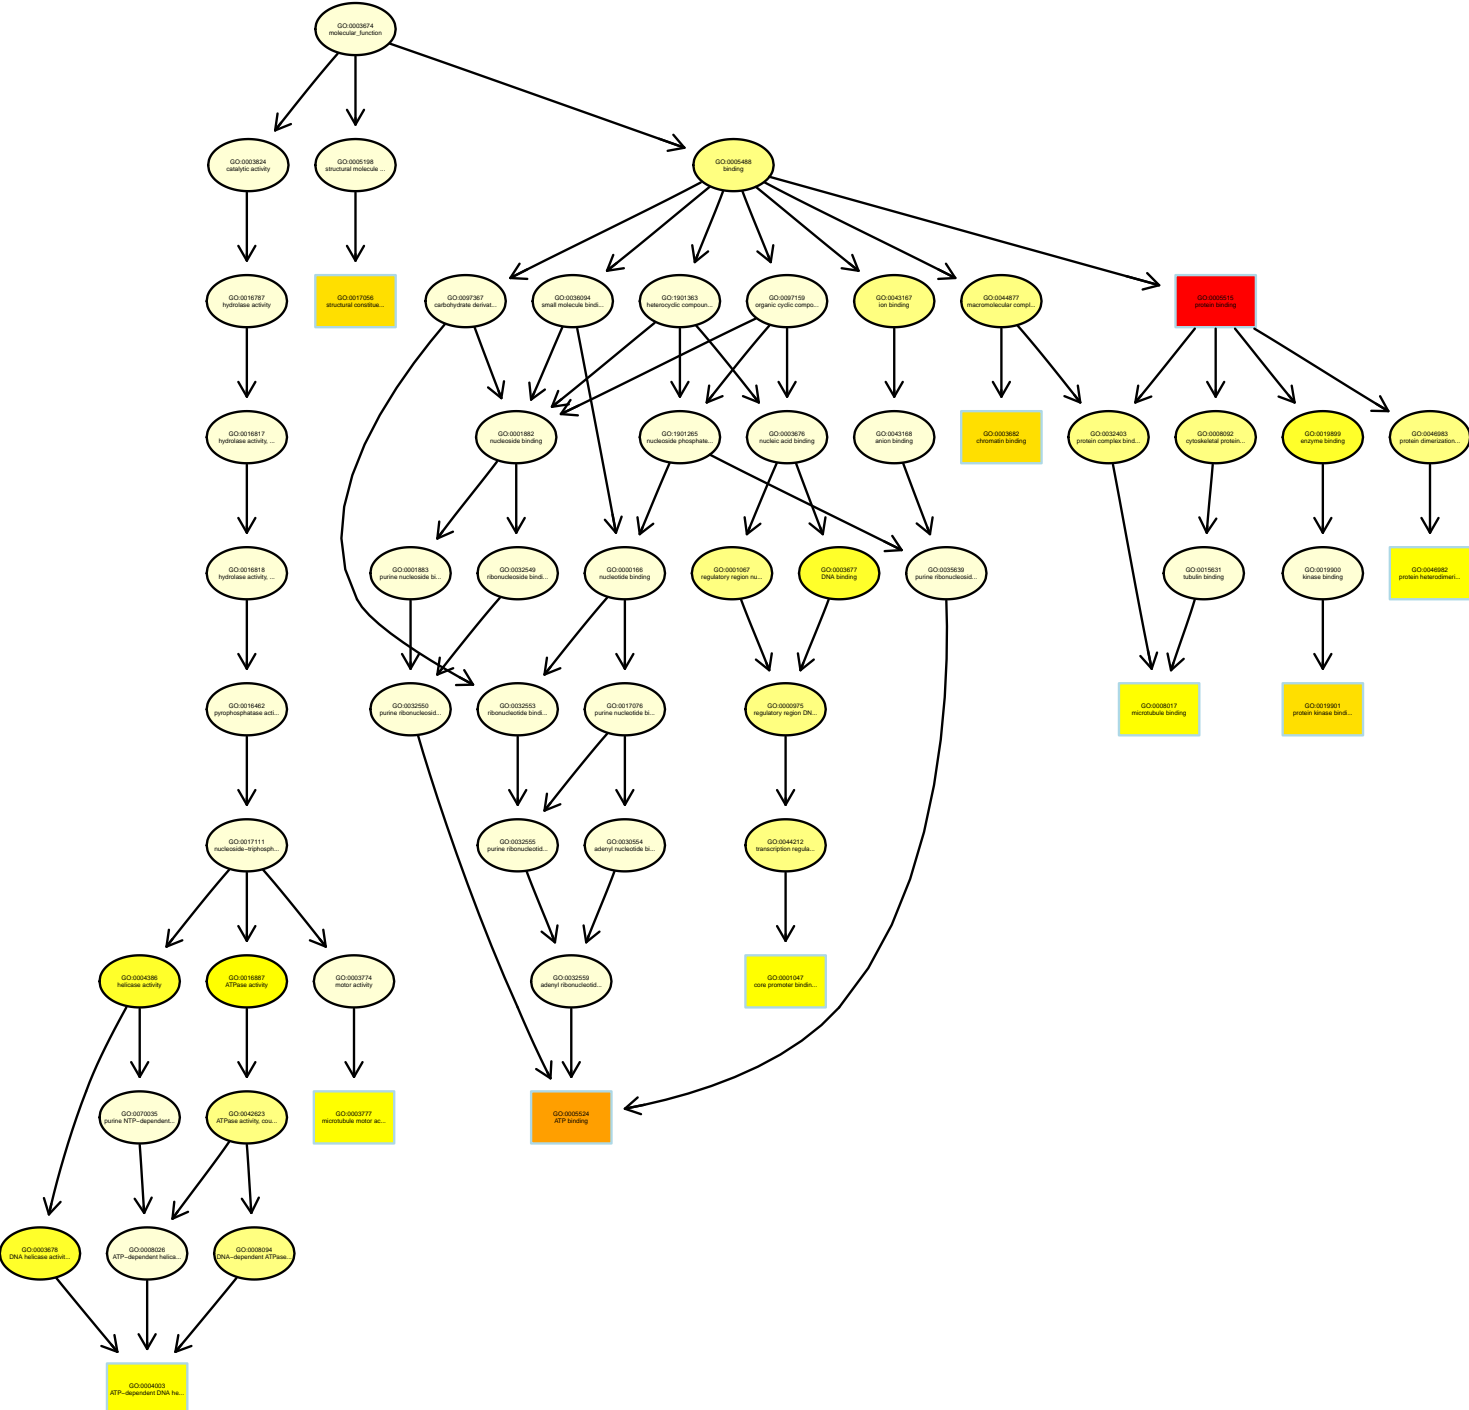

## sFigure 2C

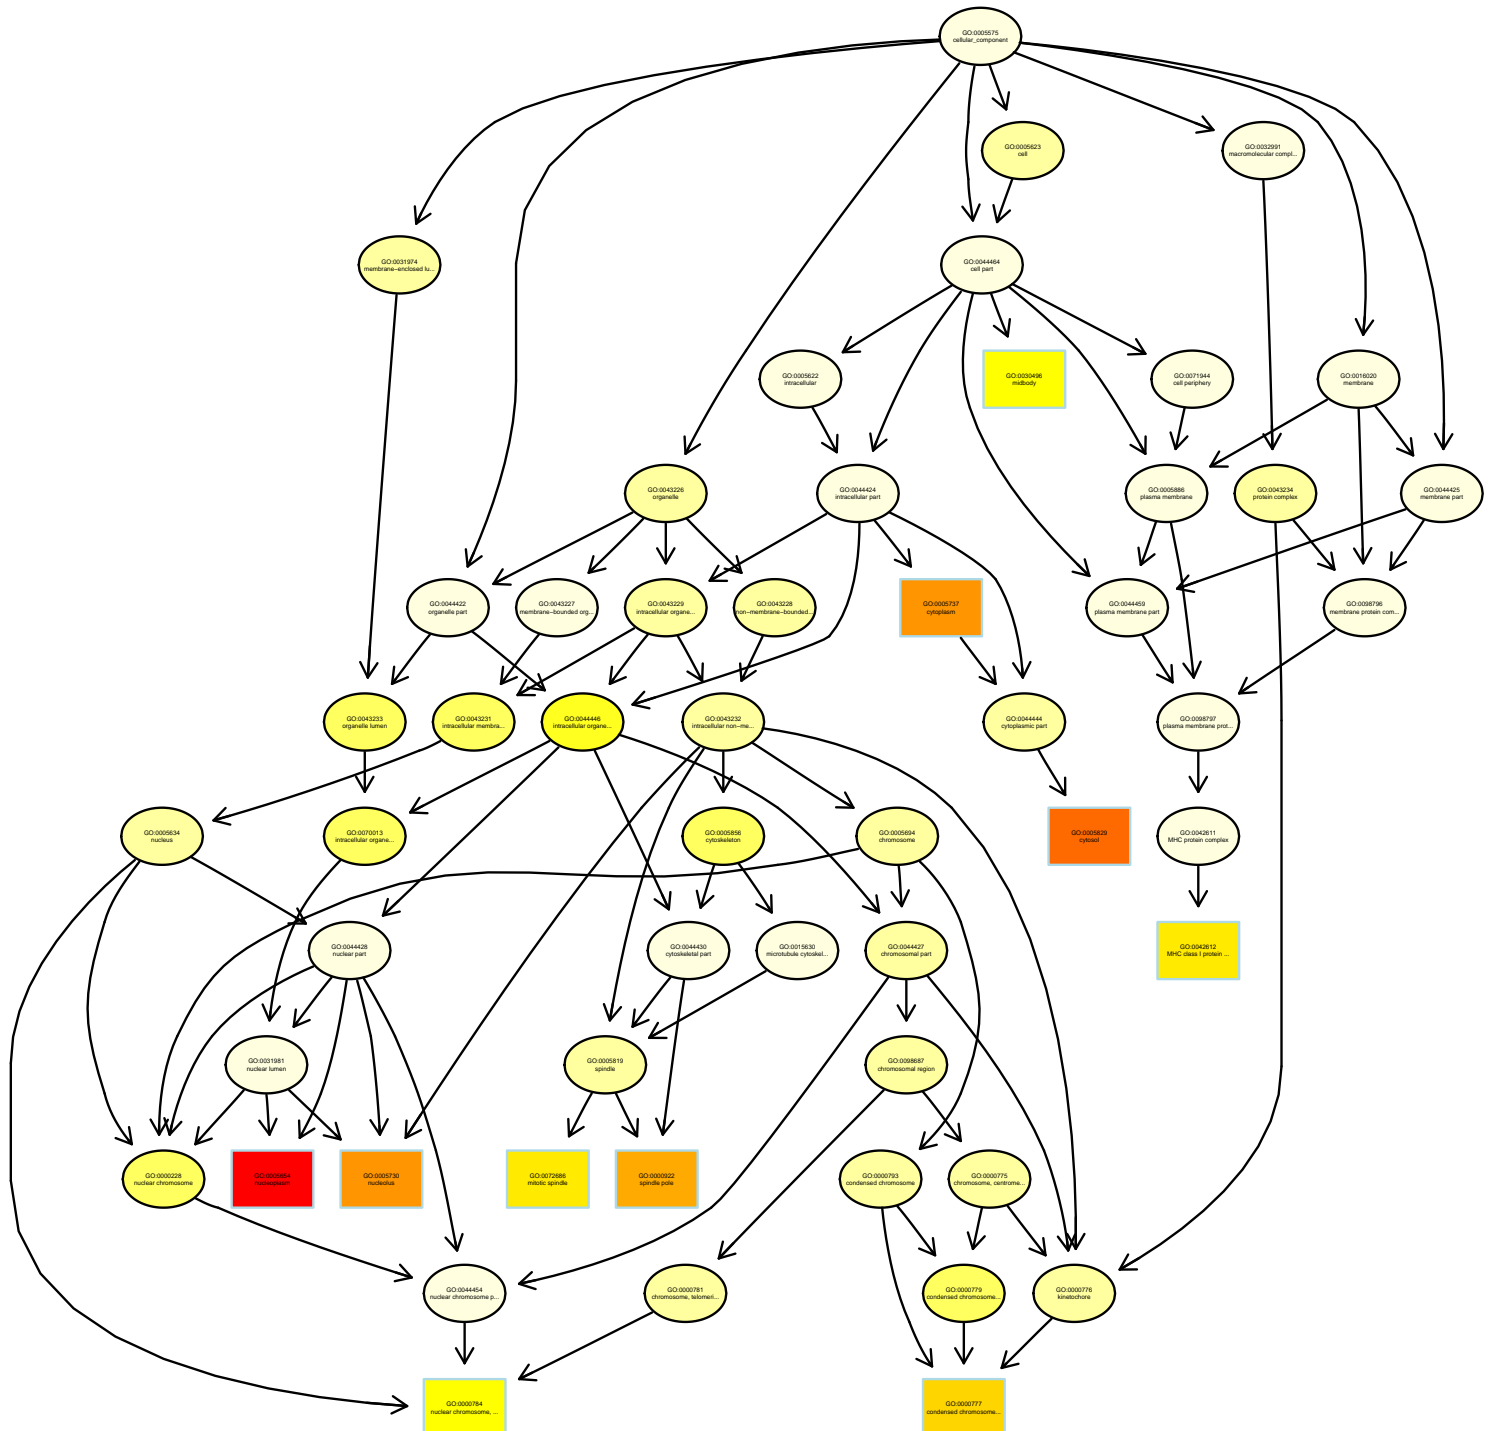

## sFigure 2D

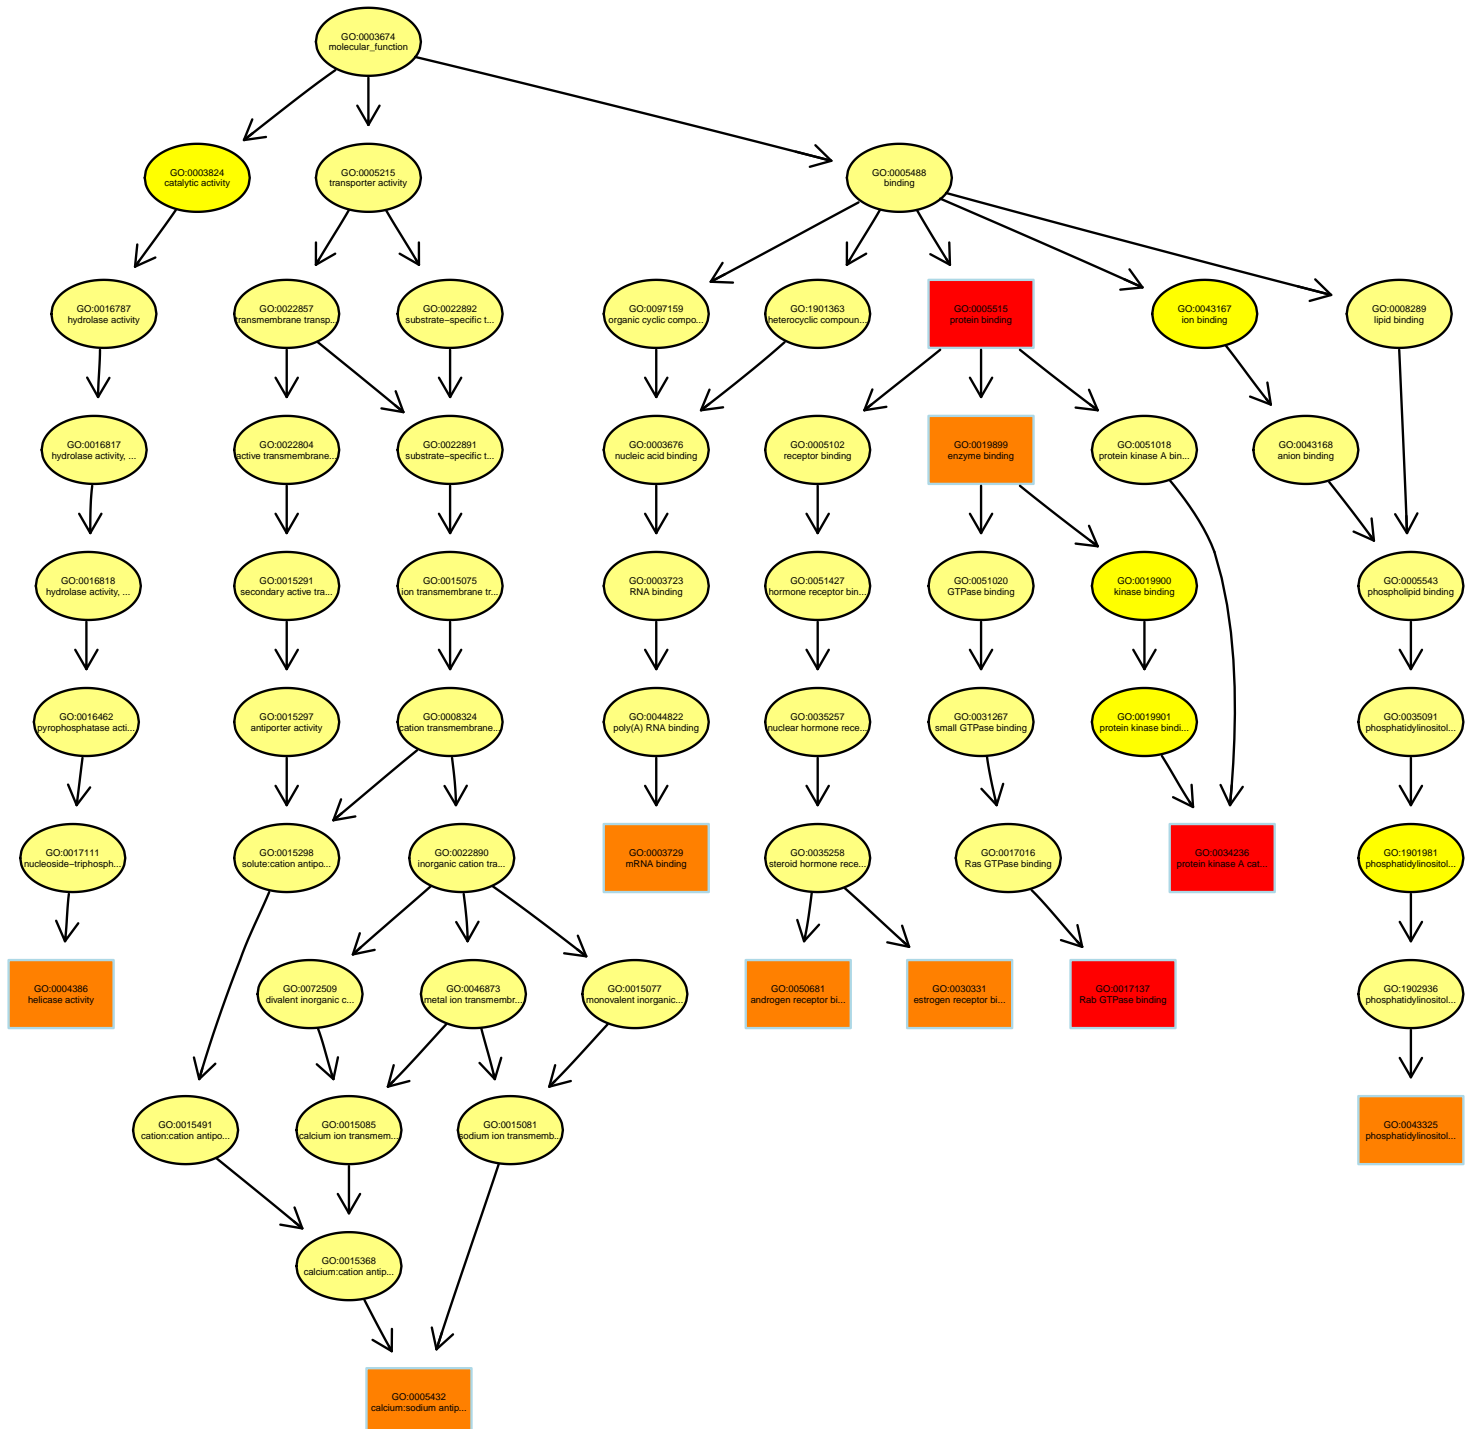

sFigure 2E

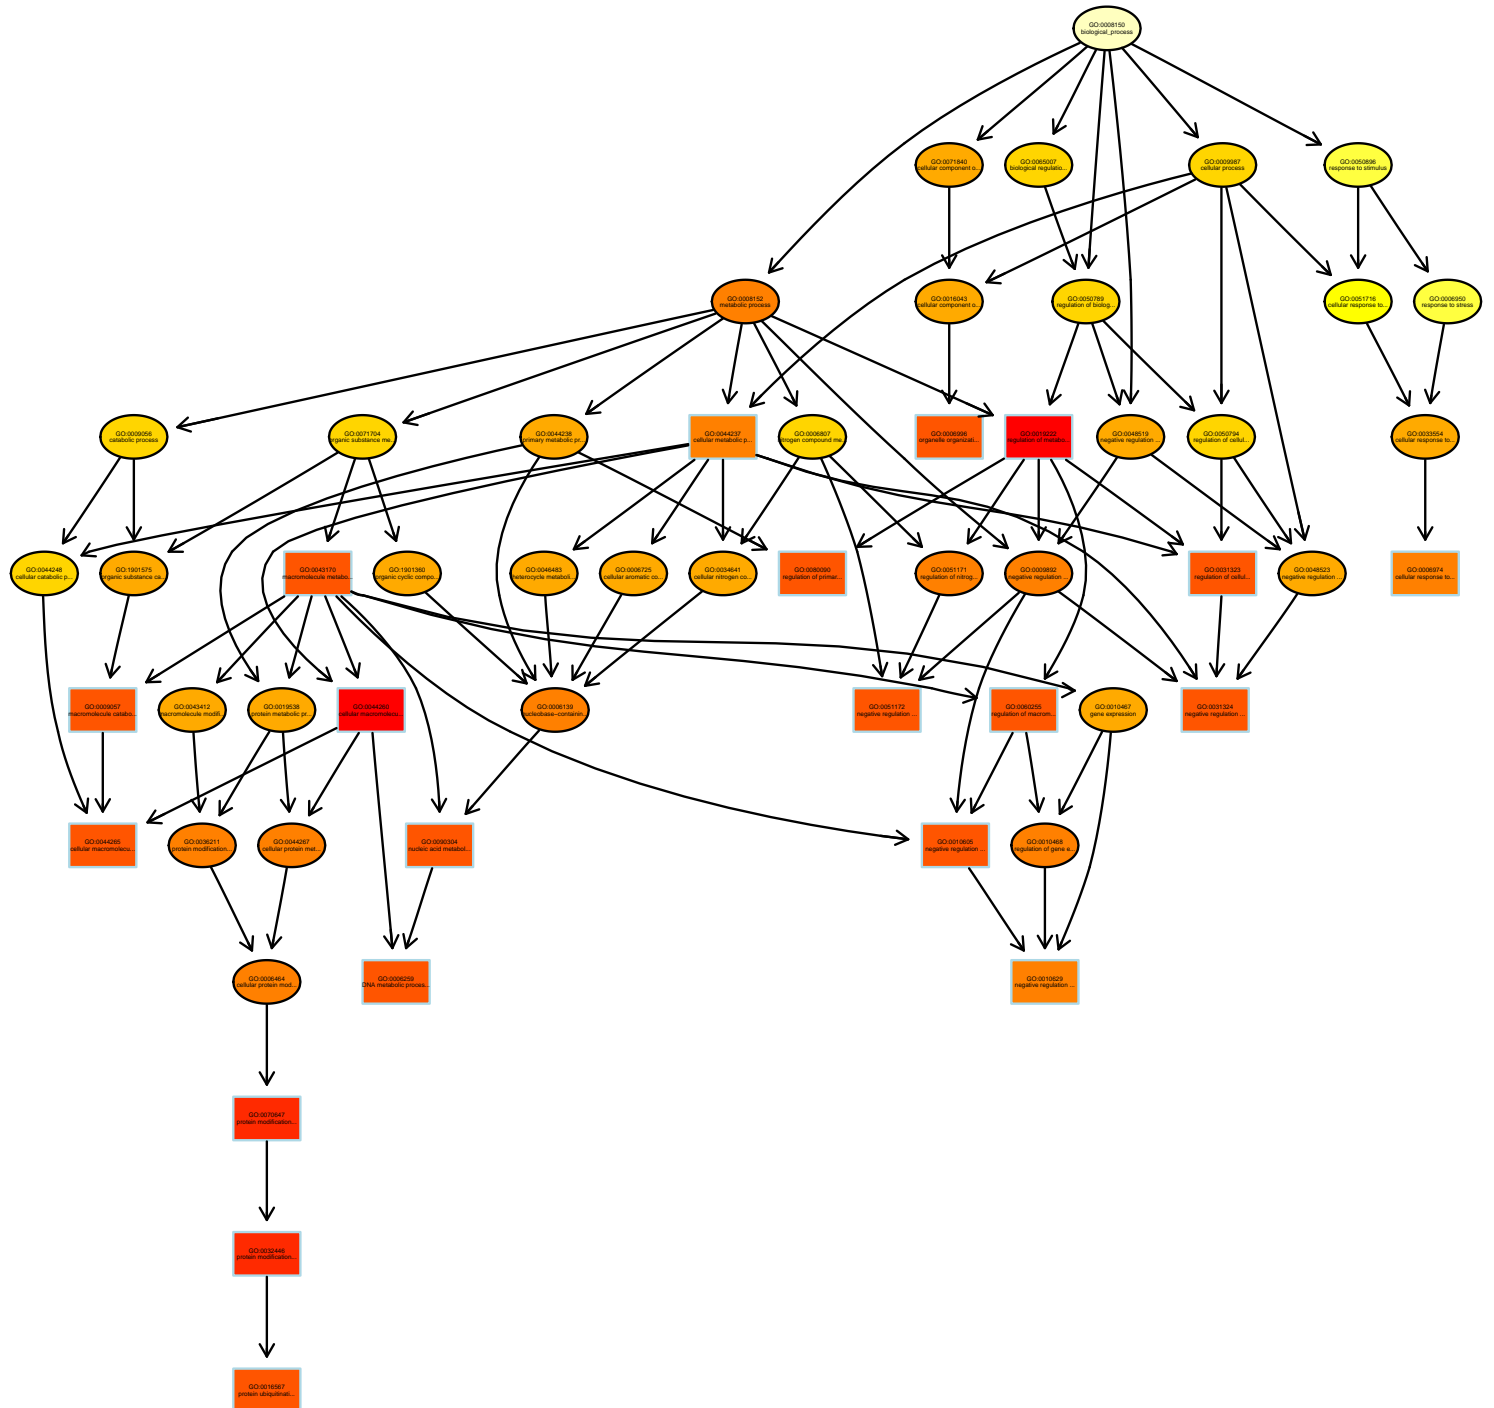

## sFigure 2F

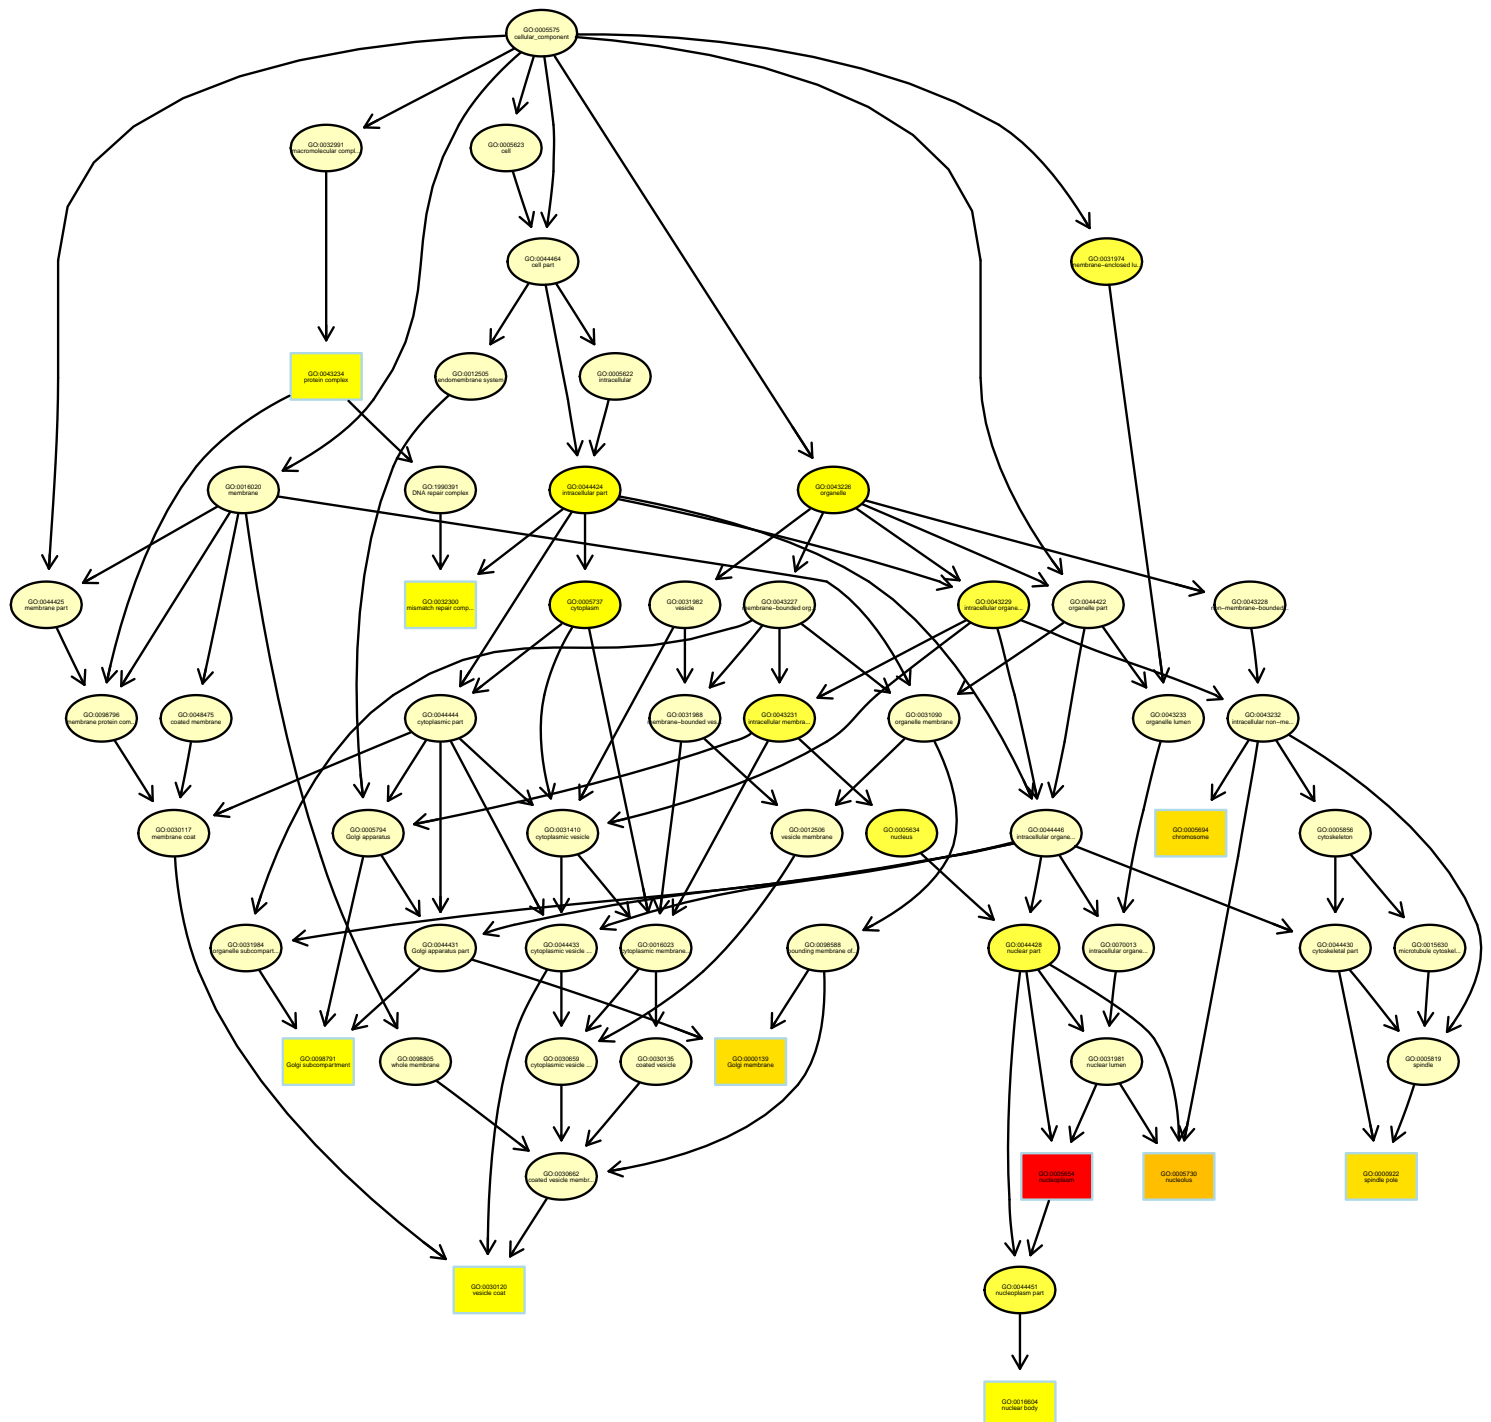

sFigure 2G

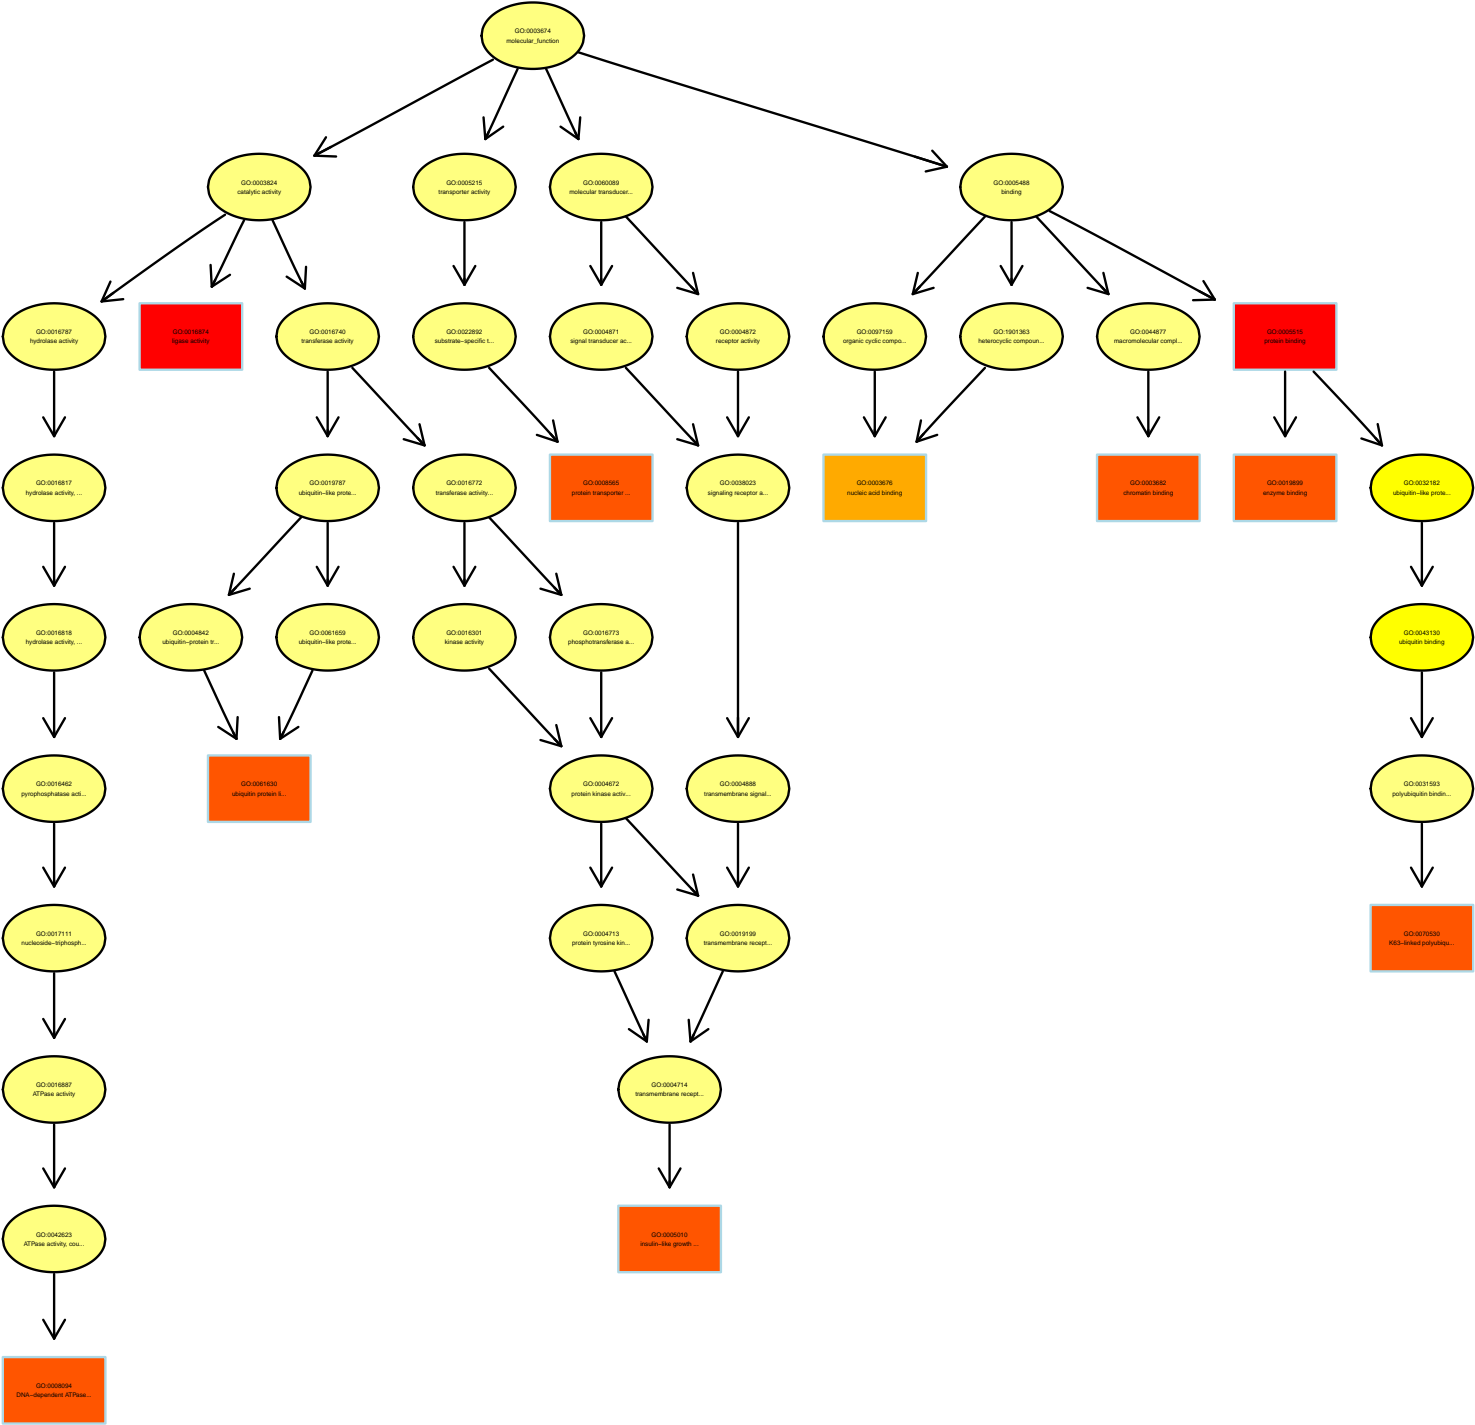

**sFigure 2** GO tree illustrating the top 10 GO terms (boxes) related to biological process (BP) and cell component (CC) molecular function (MF). The colour of the box indicates the enrichment degree, with the red box representing the highest degree of enrichment, followed by the orange and yellow boxes in descending order. (A, B) Representative GO tree in mRNA CC and MF. (C, D) Representative GO tree in lncRNA CC and MF. (E-G) Representative GO tree in circRNA BP, CC, and MF.



**sFigure 3**

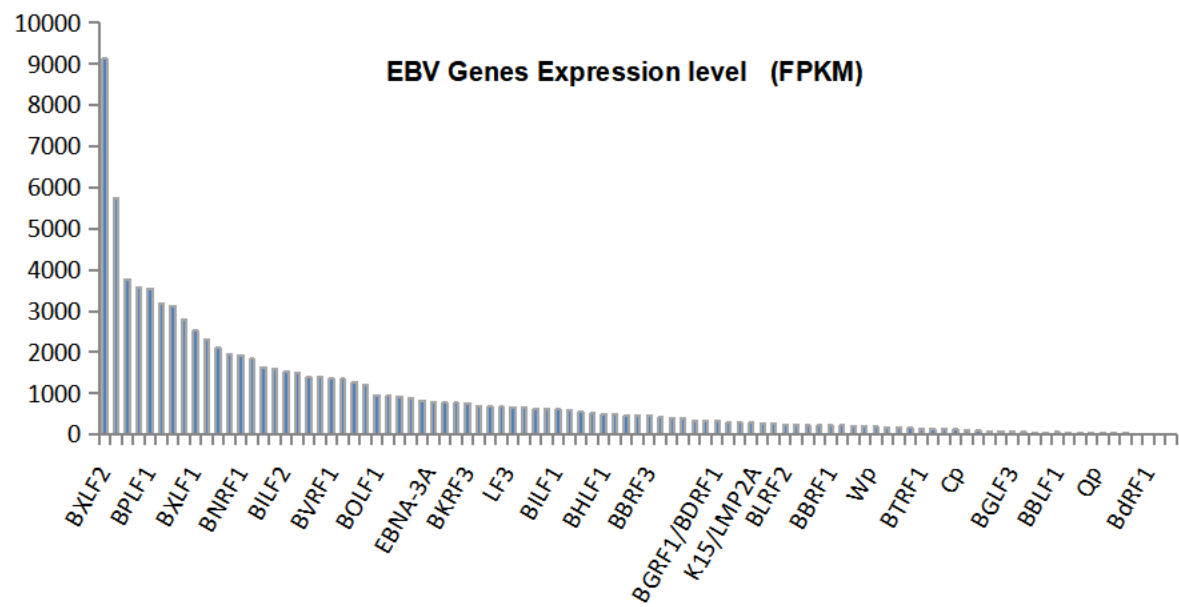

**sFigure 3** The expression of viral gene in AGS-EBV.

**sFigure 4**

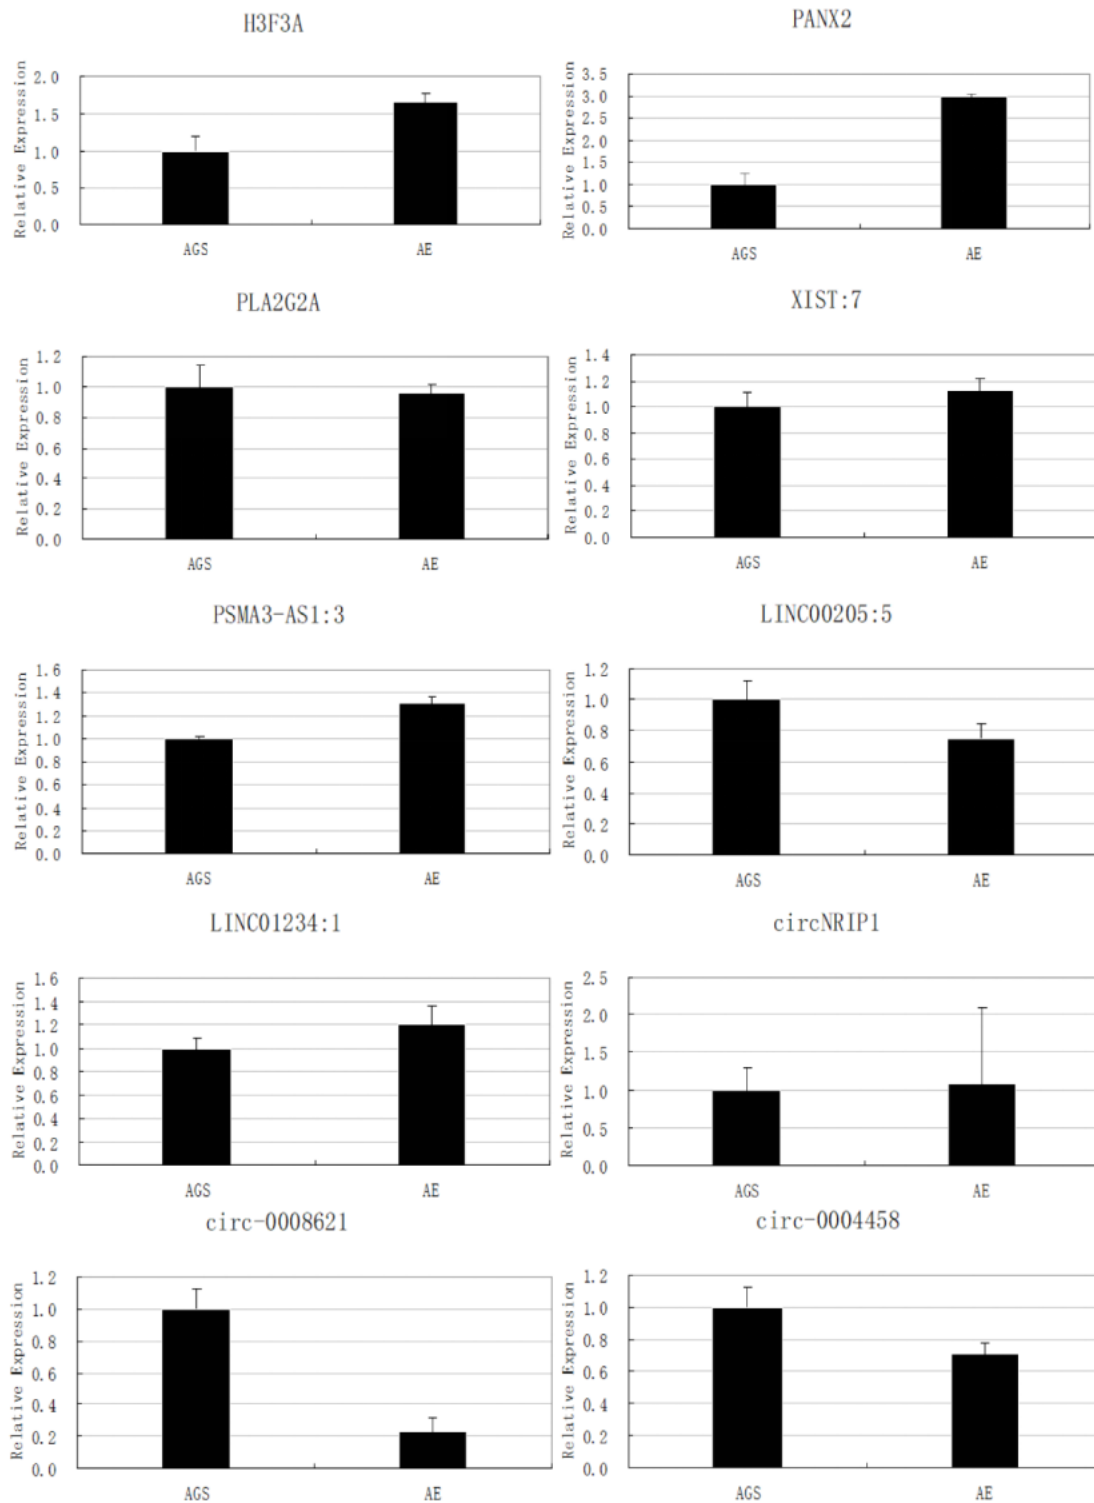

**sFigure 4** Verification of differentially expressed genes by qRT-PCR,  $P$  value  $< 0.05$ .

AE=AGS-EBV cell line. DE mRNA: H3F3A, PANX2, PLA2G2A; DE lncRNA: XIST:7, PSMA3-AS1:3, LINC00205:5, LINC01234:1; DE circRNA: circNRIP1, circ-0008621, circ-0004458.
